CORRECTION

# Correction: Assessing Greater Sage-Grouse Selection of Brood-Rearing Habitat Using Remotely-Sensed Imagery: Can Readily Available High-Resolution Imagery Be Used to Identify Brood-Rearing Habitat Across a Broad Landscape?

**Matthew Westover, Jared Baxter, Rick Baxter, Casey Day, Ryan Jensen, Steve Petersen, Randy Larsen**

The key in Fig 3 was incorrectly labeled. The authors have provided a corrected figure here.

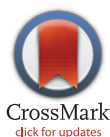

CrossMark  
click for updates

## OPEN ACCESS

**Citation:** Westover M, Baxter J, Baxter R, Day C, Jensen R, Petersen S, et al. (2016) Correction: Assessing Greater Sage-Grouse Selection of Brood-Rearing Habitat Using Remotely-Sensed Imagery: Can Readily Available High-Resolution Imagery Be Used to Identify Brood-Rearing Habitat Across a Broad Landscape? PLoS ONE 11(8): e0160725. doi:10.1371/journal.pone.0160725

**Published:** August 1, 2016

**Copyright:** © 2016 Westover et al. This is an open access article distributed under the terms of the [Creative Commons Attribution License](https://creativecommons.org/licenses/by/4.0/), which permits unrestricted use, distribution, and reproduction in any medium, provided the original author and source are credited.

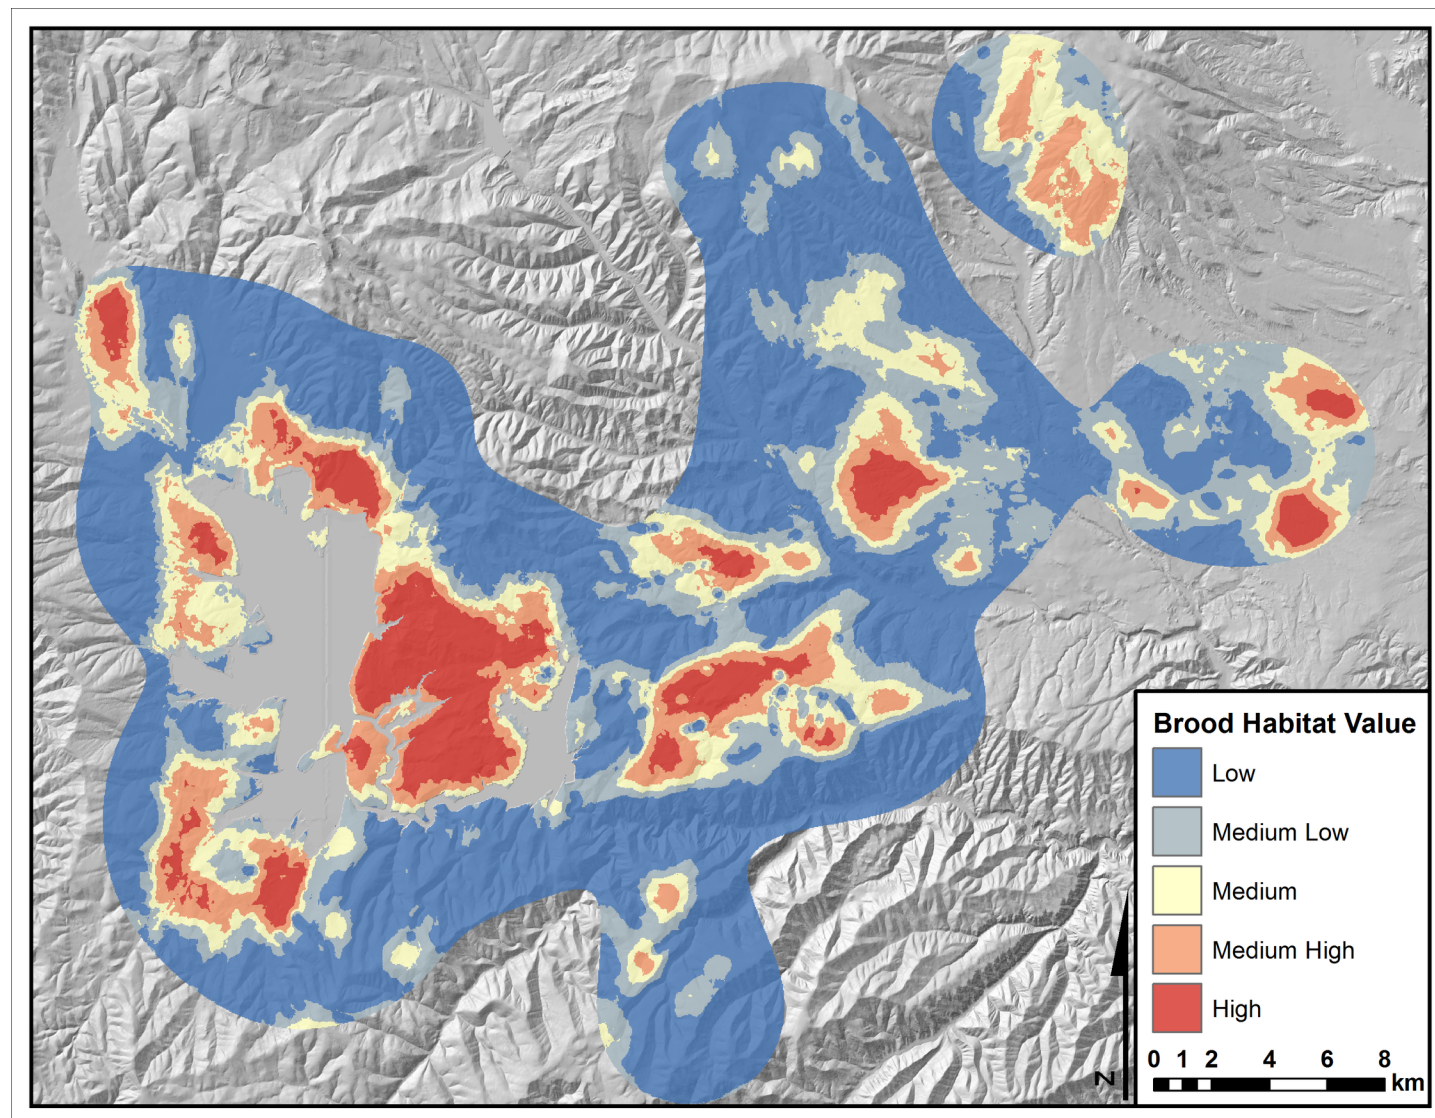

**Fig 3. Predicted brood-rearing habitat for greater sage-grouse in Strawberry Valley, Utah based on logistic regression models of landscape features identified using 1-m NAIP imagery.** Data used to generate the predictive model were collected between 1998 and 2008. Locations used to verify accuracy of the habitat map were collected between 2009 and 2012. Grey areas represent water.

doi:10.1371/journal.pone.0160725.g001

## Reference

1. Westover M, Baxter J, Baxter R, Day C, Jensen R, Petersen S, et al. (2016) Assessing Greater Sage-Grouse Selection of Brood-Rearing Habitat Using Remotely-Sensed Imagery: Can Readily Available High-Resolution Imagery Be Used to Identify Brood-Rearing Habitat Across a Broad Landscape? PLoS ONE 11(5): e0156290. doi:[10.1371/journal.pone.0156290](https://doi.org/10.1371/journal.pone.0156290) PMID: [27218829](https://pubmed.ncbi.nlm.nih.gov/27218829/)
